# Supplementary material
Source: publisher figshare collection journal article supplement (https://brill.figshare.com/ndownloader/files/35288116)
Supplement: Supplementary file 1 [file 35288116]

Glottocode,Language,Reference 1,Reference 2
abkh1244,Abkhaz,"Hewitt, B. G. 1979. Abkhaz (Lingua Descriptive Studies, vol. 2). Amsterdam: North-Holland.",
alaw1244,Alawa,"Sharpe, Margaret C. 1972. Alawa phonology and grammar (Australian Aboriginal Studies no. 37). Canberra: Australian Institute of Aboriginal Studies.",
alya1239,Alyawarra,"Yallop, Colin. 1977. Alyawarra: An Aboriginal language of Central Australia. Canberra: Australian Institute of Aboriginal Studies.",
apin1244,Apinayé,"Cunha de Oliveira, Cristiane. 2005. The language of the Apinajé people of central Brazil. University of Oregon. (Doctoral dissertation).",
awng1244,Awngi,"Hetzron, Robert. 1969. The verbal system of Southern Agaw. Berkeley: University of California Press.",
bain1263,Baining,"Parker, Jim and Parker, Diana. 1974. A tentative phonology of Baining (Kakat dialect). Phonologies of Four Papua New Guinea Languages, Workpapers in Papua New Guinea Languages vol. 4. Summer Institute of Linguistics.",
west2368,"Balochi, Western","Barker, Muhammad Abd-al-Rahman, and Aqil Khan Mengal. 1969. A course in Baluchi, 2 vols. Montreal: McGill University, Institute of Islamic Studies.",
bari1284,Bari,"Spagnolo, L. M. 1933. Bari grammar. Verona: Missioni Africane.",
basq1248,Basque,"Saltarelli, Mario, Miren Azkarate, David Farwell, Jon Ortiz de Urbina & Lourdes Oñederra. 1988. Basque. London: Croom Helm.",
russ1264,Buriat,"Poppe, Nicholas N. 1960. Buriat grammar (Indiana University Publications Uralic and Altaic Series, vol. 2). Bloomington: Indiana University; The Hague: Mouton.",
cant1236,Cantonese,"Matthews, Stephen & Virginia Yip. 1994. Cantonese: A comprehensive grammar. New York: Routledge.",
gali1262,Carib,"Courtz, Henk. 2008. A Carib grammar and dictionary. Toronto: Magoria Books.",
chep1245,Chepang,"Caughley, Ross Charles. 1969. Chepang phonemic summary. Summer Institute of Linguistics, Tribhuvan University.",
chey1247,Cheyenne,"Frantz, Donald G. 1972. Cheyenne distinctive features and phonological rules. International Journal of American Linguistics 38: 6-13.",
coca1259,Cocama,"Faust, Norma and Evelyn G. Pike. 1959. The Cocama sound system = o istema fonemico do kokama. Publicaciones do Museu Nacional. Serie Linguistica especial 1: 10-55.",
dako1258,Dakota,"Boas, Franz and Ella Deloria. 1939. Dakota grammar. Memoirs of the National Academy of Sciences, vol. 23, no. 2: 1-183.",
dann1241,Dan,"Bearth, T. and Zemp, H. 1967. The phonology of Dan (Santa). Journal of African Languages 6. 9-29.",
mode1248,"Greek, Modern","Householder, Fred W., Kostas Kazasis, and Andreas Koutsoudas. 1964. Reference grammar of Literary Dhimotiki (International Journal of American Linguistics 30, no.2, part 2).",
koka1244,Gugada,"Platt, J. T. 1972. An outline grammar of the Gugada dialect, South Australia. Canberra: Australian Institute of Aboriginal Studies.",
isla1278,Island Carib,"Taylor, Douglas. 1955. Phonemes of the Hopkins (British Honduras) dialect of Island Carib (=Island Carib I). International Journal of American Linguistics 21: 233-41.",
shua1257,Jivaro,"Turner, Glen D. 1958. Jivaro: phonology and morphology. Ph.D. dissertation, Indiana University, Bloomington.",
kadi1248,Kadiwéu,"Sandalo, Filomena. 1997. A grammar of Kadiweu: With special reference to the polysynthesis parameter (MIT Working Papers in Linguistics 11). Cambridge, MA: MIT Press.",
kala1399,Kalaallisut,"Fortescue, Michael. 1984. West Greenlandic. London: Croom Helm.",
dera1248,Kanakuru,"Newman, Paul. 1974. The Kanakuru language. Leeds: Institute of Modern English Language Studies, University of Leeds, in association with The West African Linguistic Society.",
cent2050,Kanuri,"Cyffer, Norbert. 1998. A sketch of Kanuri. Köppe.",
karo1304,Karok,"Bright, William. 1957. The Karok language (University of California Publications in Linguistics 13). Berkeley: University of California Press.",
gras1249,Koiari,"Dutton, Tom E. 1996. Koiari. München: Lincom Europa.",
kuii1252,Kui,"Winfield, W. W. 1928. A grammar of the Kui language (Biblioteca Indica, work no. 245). Calcutta: The Asiatic Society of Bengal.",
kuku1273,Kuku-Yalanji,"Patz, Elizabeth. 1982. A grammar of the Kuku Yalanji language of North Queensland. Ph.D. diss, Australian National University, Canberra.",
lahu1253,Lahu,"Matisoff, James A. 1973. The grammar of Lahu (University of California Publications in Linguistics, vol. 75). Berkeley: University of California Press.",
lati1261,Latin,"Kent, Roland. 1945. The sounds of Latin: a descriptive and historical phonology. Baltimore: Linguistic society of America.",
logb1245,Logba,"Dorvlo, K. 2008. A grammar of Logba (Ikpana). Netherlands Graduate School of Linguistics (LOT), Leiden University.",
maya1282,Ma'ya,"van der Leeden, A. C. 1993. Ma'ya: a language study. Phonology. Jakarta: Lembaga Ilmu Pengetahuan Indonesia and Rijkuniversiteit te Leiden.",
nort2952,Maidu,"Shipley, William F. 1964. Maidu grammar (University of California Publications in Linguistics, vol. 41). Berkeley: University of California Press.",
marg1265,Margi,"Hoffman, Carl. 1963. A grammar of the Margi language. London: Oxford University Press.",
maib1239,Maybrat,"Dol, Philomena. 2007. A grammar of Maybrat: A language of the Bird’s Head Peninsula, Papua Province, Indonesia. Canberra: Pacific Linguistics.",
moro1285,Moro,"Black, Mr. K. and Black, Mrs. K. 1971. The Moro Language Grammar and Dictionary. Linguistic Monograph Series, 6. 6. Khartoum: Sudan Research Unit, Faculty of Arts.",
nucl1240,Mumuye,"Shimuzu, Kiyoshi. 1983. The Zing dialect of Mumuye: A descriptive grammar. Hamburg: Helmut Buske.",
mwer1248,Mwera,"Harries, Lyndon. 1950. A grammar of Mwera. Johannesburg: Witwatersrand University.",
naka1262,Nakanai,"Johnston, Raymond Leslie. 1980. Nakanai of New Britain: the grammar of an Oceanic language. (Pacific linguistics, Series B, 70.) Canberra: Dept. of Linguistics, Research School of Pacific Studies, Australian National University for Linguistic Circle of Canberra.",
ngab1239,Ngäbere (Guaymi),"Lininger Ross, Barbara. 1981. Estudios sobre el Guaymí Ngabere: Fonología, Alfabeto y Diccionario Provisional. Revista de Filología y Lingüística de la Universidad de Costa Rica 7(1):101-15.",
ngam1268,Ngambay,"Vandame, R. P. Charles. 1963. Le Ngambay-Moundou: Phonologie, grammaire et textes (Memoires de l'Institut Francais d'Afrique Noire no. 69). Dakar: Ifan.",
carn1240,Nicobarese (Car),"Braine, Jean Critchfield. 1970. Nicobarese grammar (Car dialect). Ph.D. dissertation, University of California, Berkeley.",
nucl1633,Nimboran,"Anceaux, Johannes C. 1965. The Nimboran language: Phonology and morphology. The Hague: M. Nijhoff.",
ning1273,Ningil,"Manning, M. and Jaggers, N. 1977. A Tentative Phonemic Analysis of Ningil. In Loving, R. (ed.), Phonologies of Five Papua New Guinea Languages, 49-72. Ukarnumpa, Papua New Guinea: Summer Institute of Linguistics.",
norw1258,Norwegian,"Vanvik, A. 1972. A phonetic-phonemic analysis of Standard Eastern Norwegian. Norwegian Journal of Linguistics, 26, 119-164.",
oksa1245,Oksapmin,"Loughnane, Robyn. 2009. A grammar of Oksapmin. University of Melbourne. (Doctoral dissertation).",
pala1351,Palantla Chinantec,"Merrifield, William R. 1963. Palantla Chinantec syllable types. Anthropological Linguistics 5, no. 5: 1-16.",
shwe1236,Palaung,"Shorto, H. L. 1960. Word and syllable patterns in Palaung. Bulletin of the School of Oriental and African Studies 23: 544-57.",
phal1254,Palula,"Liljegren, H. 2008. Towards a grammatical description of Palula: An Indo-Aryan language of the Hindu Kush.",
pang1290,Pangasinan,"Benton, Richard A. 1971. Pangasinan reference grammar. Honolulu: University of Hawaii Press.",
pech1241,Pech,"Holt, Dennis. 1986. The development of the Paya sound system. University of California at Los Angeles. (Doctoral dissertation).",
ruka1240,Rukai,"Li, Paul Jen-Kuei. 1973. Rukai Structure. Ph.D. dissertation, The University of Hawaii, Honolulu.",
sapu1248,Sapuan,"Jacq, P. and Sidwell, P. 1999. Sapuan (Sepuar). Languages of the World/Materials, 302. 302. München: Lincom Europa.",
sele1250,Selepet,"McElhanon, Kenneth A. 1970. Selepet phonology. (Pacific Linguistics, Series B, 14.) Canberra: Australian National University.",
shek1245,Sheko,"Hellenthal, Anne-Christie. 2010. A grammar of Sheko. Ph.D. dissertation, University of Leiden.",
shus1248,Shuswap,"Kuipers, Aert H. 1974. The Shuswap language: Grammar, texts, dictionary. The Hague: Mouton.",
sina1266,Sinaugoro,"Tauberschmidt, Gerhard. 1999. A Grammar of Sinaugoro. Pacific Linguistics, Series C, 143. 143. Canberra: Australian National University.",
nort2942,Slave (Hare dialect),"Rice, Keren. 1989. A grammar of Slave. Berlin: Mouton de Gruyter.",
sapo1253,Taiof,"Ross, Malcolm. 2002. Taiof. In Lynch, John and Ross, Malcolm and Crowley, Terry (eds.), The Oceanic Languages, 426-439. Richmond: Curzon.",
timn1235,Temne,"Wilson, W. A. A. 1961. An outline of the Temne language. London: University of London, School of Oriental and African Studies.",
tern1247,Ternate,"Hayami-Allen, Rika. 2001. A descriptive study of the language of Ternate, the northern Moluccas, Indonesia. University of Pittsburgh.",
tiga1245,Tigak,"Beaumont, Clive H. 1979. The Tigak Language of New Ireland. Pacific Linguistics, Series B, 58. 58. Canberra: Australian National University.",
tigr1270,Tigre,"Raz, Shlomo. 1983. Tigre grammar and texts (Afroasiatic dialects, 4). Malibu: Undena.",
tiri1258,Tinrin,"Osumi, Midori. 1995. Tinrin Grammar. Honolulu: University of Hawaii Press.",
toho1245,Tohono O’odham,"Saxton, Dean. 1963. Papago phonemes. International Journal of American Linguistics 29. 29–35.",
tojo1241,Tojolabal,"Furbee-Losee, Louanna. 1976. The correct language: Tojolabal: A grammar with ethnographic notes. New York: Garland.",
tond1251,Tondano,"Sneddon, James N. 1975. Tondano Phonology and Grammar. Pacific Linguistics, Series B, 38. 38. Canberra: Australian National University.",
toab1237,Toqabaqita,"Lichtenberk, Frantisek. 2008. A grammar of Toqabaqita. Berlin and New York: Mouton de Gruyter.",
chuu1238,Trukese,"Dyen, Isidore. 1965. A sketch of Trukese grammar (American Oriental Essay No. 4). New Haven: American Oriental Society.","Goodenough, W. H. and H. Sugita. 1980. Trukese-English dictionary. Philadelphia: American Philosophical Society."
trum1247,Trumai,"Guirardello, Raquel. 1999. A Reference Grammar of Trumai. Ph.D. dissertation, Rice University.",
tama1365,Tuareg (Tamasheq),"Prasse, Karl-G. and Ag-Sidiyan, E. Agg-Albostan. 1985. Tableaux morphologiques (dialecte touareg de l'Adrar du Mali (berbère)): Tesaten ën-tmawiten (Tamashaq, Adagh, Mali). Copenhague.",
tuca1252,Tucano,"West, Birdie and Welch, Betty. 1967. Phonemic system of Tucano. In Viola G. Waterhouse (ed.), Phonemic systems of Colombian languages, 11-24. Norman: Summer Institute of Linguistics of the University of Oklahoma.",
uigh1240,Uyghur,"Hahn, Reinhard F. 1991. Spoken Uyghur. Seattle: University of Washington Press.","Nadzhip, E. N. 1971. Modern Uigur, trans. D. M. Segal. Moscow: Nauka."
bign1238,V’enen Taut,"Fox, Greg J. 1979. Big Nambas grammar. Pacific linguistics, Series B, 60. 60. Canberra: Dept. of Linguistics, Research School of Pacific Studies, Australian National University.",
ware1253,Warembori,"Donohue, Mark. 1999. Warembori. München: Lincom Europa.",
yaga1260,Yagaria,"Renck, G. L. 1975. A grammar of Yagaria (Pacific Linguistics B 40) Canberra: Australian National University.",
yele1255,Yelî Dnye,"Henderson, James. 1995. Phonology and grammar of Yele, Papua New Guinea. Pacific Linguistics, Series B, 112. 112. Canberra: Australian National University.",
yess1239,Yessan-Mayo,"Foreman, Velma and Marten, Helen. 1973. Yessan-Mayo phonemes. In Healey, Alan (ed.) Phonologies of three languages of Papua New Guinea, Workpapers in Papua New Guinea Languages vol. 2, 79-108. Summer Institute of Linguistics.",
yima1243,Yimas,"Foley, William A. 1991. The Yimas Language of Papua New Guinea. Stanford: Stanford University Press.",
zuni1245,Zuni,"Newman, Stanley. 1965. Zuni Grammar. (University of New Mexico Publications in Anthropology, 14.) Albuquerque: The University of New Mexico Press.",
